# Supplementary material for: Triptolide Modulates TREM-1 Signal Pathway to Inhibit the Inflammatory Response in Rheumatoid Arthritis
Source: PubMed Central journal article supplement (PMC4848954; doi:10.3390/ijms17040498), 2016-04-02
Supplement: ijms-17-00498-s001.pdf [file ijms-17-00498-s001.pdf]

# Supplementary Materials: Triptolide Modulates TREM-1 Signal Pathway to Inhibit the Inflammatory Response in Rheumatoid Arthritis

Danping Fan, Xiaojuan He, Yanqin Bian, Qingqing Guo, Kang Zheng, Yukun Zhao, Cheng Lu, Baoqin Liu, Xuegong Xu, Ge Zhang and Aiping Lu

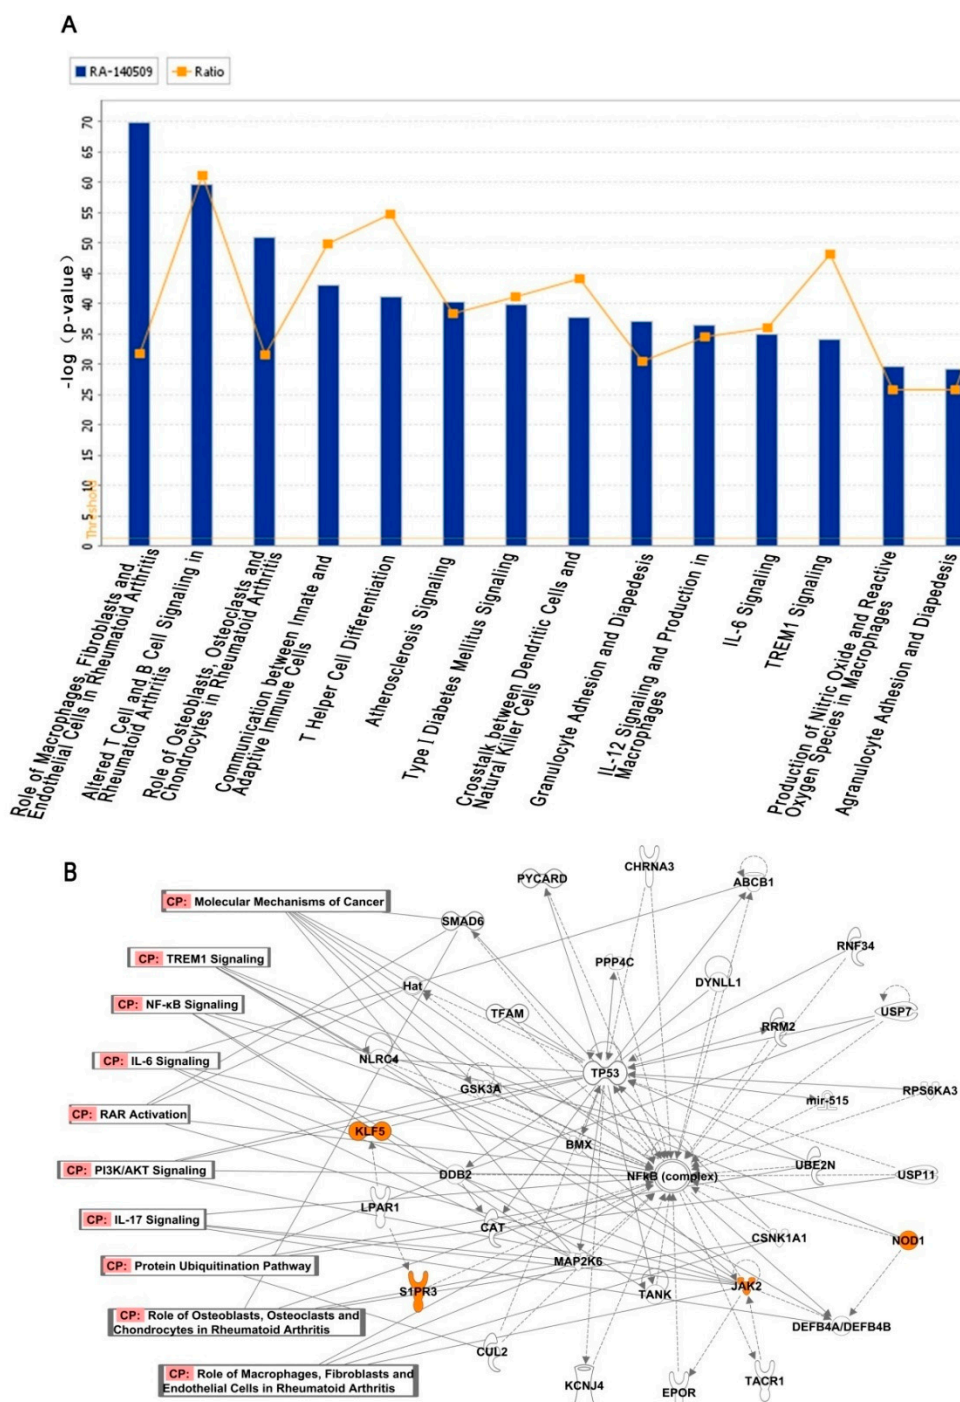

**Figure S1.** The results of bioinformatics analysis. (A) Top 15 signaling pathways over threshold related with 832 RA genes from GENE database in NCBI by Ingenuity Pathway Analysis (IPA) software; and (B) The molecular networks of Triptolide (TP) target proteins, Orange nodes represented the protein targets of TP.

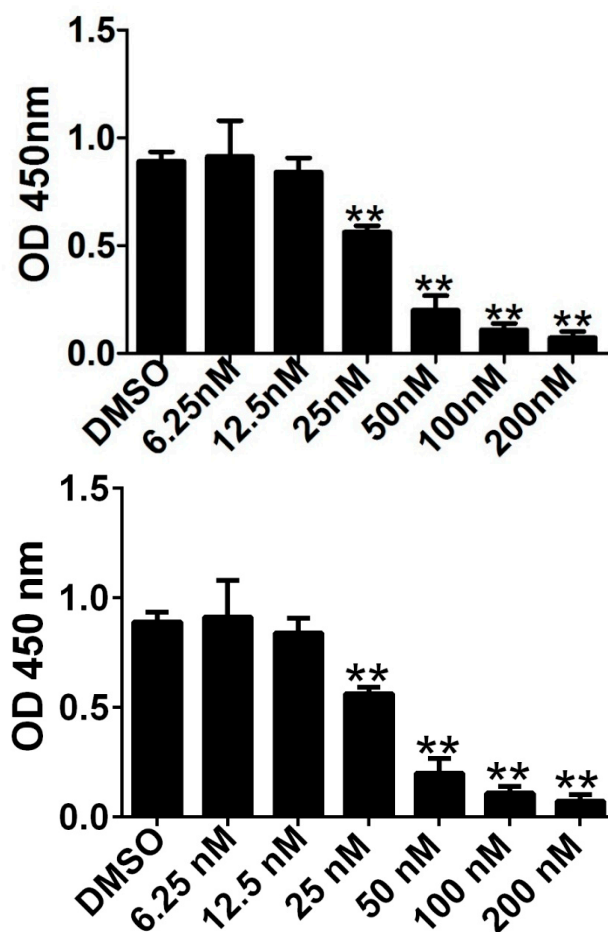

**Figure S2.** Cytotoxicity of TP on U937 cells. U937 cells were treated with different concentration of TP for 24 h, and their viability was determined using cell counting kit (CCK)-8 assay. \*\*  $p < 0.01$  versus group without TP treatment. The data are presented as the mean  $\pm$  SD from three independent experiments.

**Table S1.** The human target proteins of Triptolide (TP).

| Name                                                           | GenInfo Identifier No. |
|----------------------------------------------------------------|------------------------|
| nucleotide-binding oligomerization domain-containing protein 1 | 5174617                |
| sphingosine 1-phosphate receptor 3                             | 38788193               |
| Chain A, Human Bcl2-A1 In Complex With Bim-Bh3 Peptide         | 167013344              |
| Janus kinase 2                                                 | 119579178              |
| Tyrosyl-DNA phosphodiesterase1 protein                         | 79154014               |
| Sphingosine-1-phosphate receptor 4                             | 15929025               |
| serine/threonine kinase 33                                     | 12830367               |
| Kruppel-like factor 5                                          | 124263658              |
